# Supplementary material for: Psychometric Properties of the Dutch Strengths and Difficulties Questionnaire (SDQ) in Adolescent Community and Clinical Populations
Source: PubMed Central journal article supplement — Assessment. 2018 Oct 8;27(7):1476–89. doi: 10.1177/1073191118804082 (PMC7427112; doi:10.1177/1073191118804082), 2018-10-08
Supplement: ESM_1and_2.pdf [file ESM_1and_2.pdf]

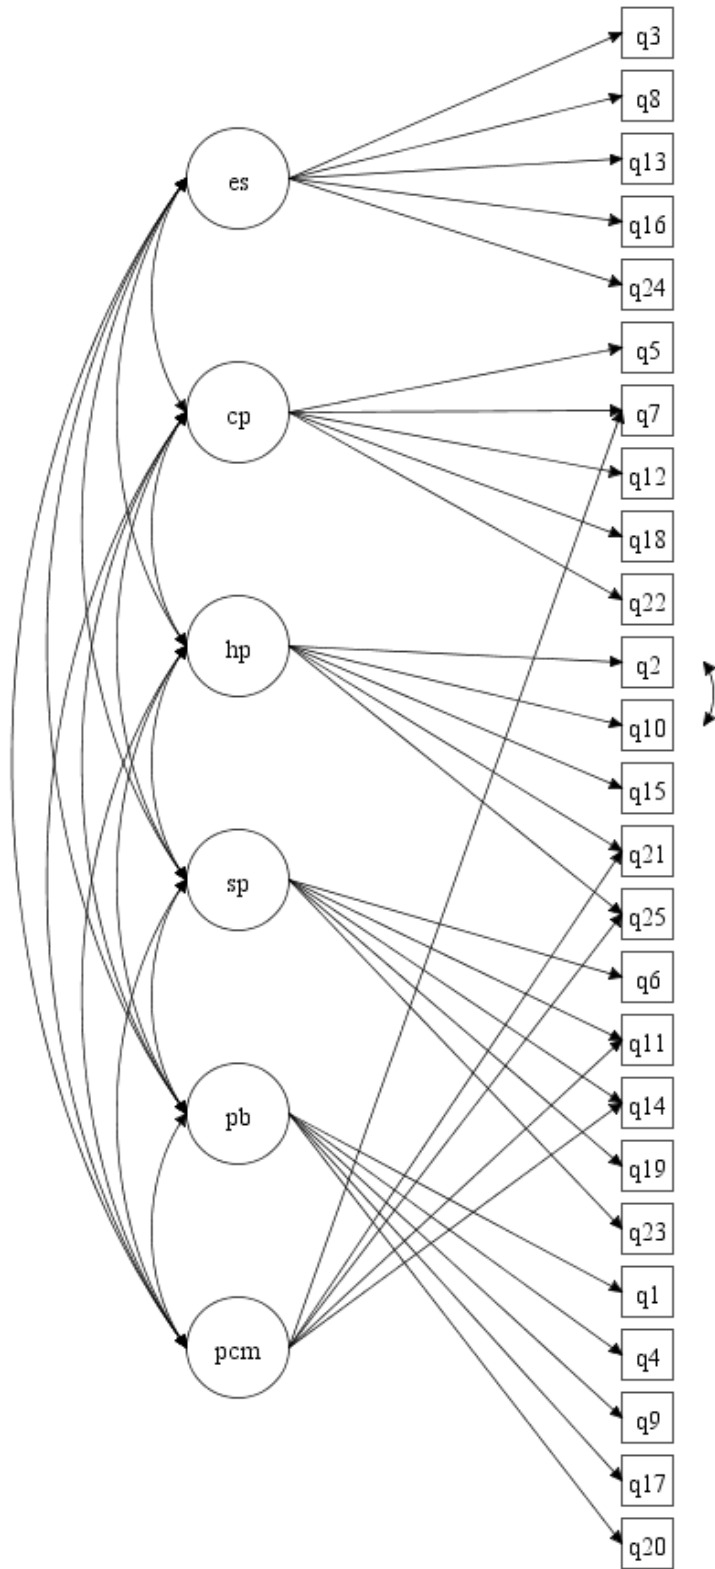

**Fig. S1** Representation of the fitted six-factor model for the SDQ adolescent version in the clinical and community settings. ES = emotional symptoms, CP = conduct problems, HP = hyperactivity/attention problems, SP = social problems, PB = prosocial behaviour, PCM = positive construal method

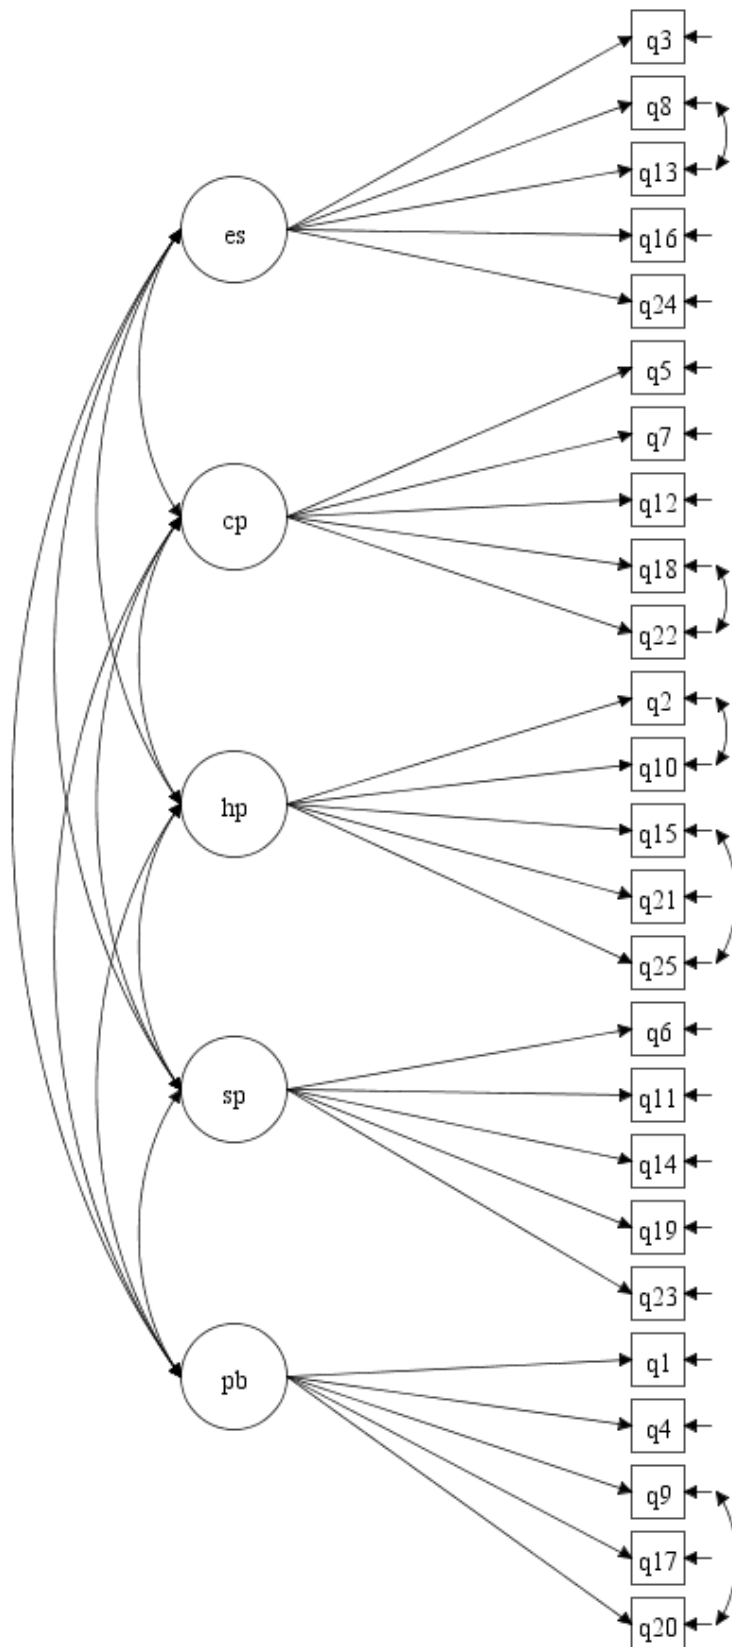

**Fig. S2** Representation of the fitted five-factor model for the SDQ parent version in the clinical and community settings. ES = emotional symptoms, CP = conduct problems, HP = hyperactivity/attention problems, SP = social problems, PB = prosocial behaviour
